# Supplementary material for: Mapping review of ‘proof-of-concept’ in mental health implementation research using the TRL framework: a need for a better focus and conceptual clarification
Source: HighWire-hosted journal article supplement (doi:10.1136/bmjopen-2023-080078), 2024-08-01
Supplement: bmjopen-2023-080078supp001_data_supplement.pdf [file bmjopen-2023-080078supp001_data_supplement.pdf]

## Search Strategy

### PubMed

Search terms:

"mental health care"[All Fields] AND "proof of concept"[All Fields]

"digital mental health"[All Fields] AND "proof of concept"[All Fields]

"technology readiness level"[All Fields] AND "digital mental health"[All Fields]

**Filter:** English language

### PsycINFO

Search terms:

Any Field: "mental health care" AND Any Field: "proof of concept"

Any Field: "digital mental health" AND Any Field: "proof of concept"

Any Field: "technology readiness level" AND Any Field: "digital mental health"

### Language

- english
